# Supplementary material for: Molecular oxygen activation by a molybdenum(iv) monooxo bis(β-ketiminato) complex
Source: Royal Society of Chemistry journal article supplement (doi:10.1039/b617199k), 2007-01-01
Supplement: b617199k.pdf [file b617199k.pdf]

## Supporting Information

### Experimental

#### General

All manipulations were carried out under dry nitrogen using standard Schlenk line or glove box techniques. All solvents were purified by standard methods and distilled under a nitrogen atmosphere immediately prior to use. 4-(2,6-Dimethyl-phenylimino)-pent-2-en-ol<sup>1</sup> and [MoO<sub>2</sub>Cl<sub>2</sub>]<sup>2</sup> were prepared according to literature procedures. Toluene for spectroscopy (conform to ACS) was ordered from Acros and distilled over Na/benzophenone. All other chemicals mentioned were used as purchased from commercial sources (Aldrich, Merck, Strem).

Samples for mass spectrometry were measured on a BIO-RAD Digilab FTS-7 mass spectrometer with a Finnigan MAT 95 and all NMR spectra on a Bruker Avance 500 or 200 MHz. Elemental analyses were performed by the Analytisches-Chemisches Laboratorium des Instituts für Anorganische Chemie, Göttingen and Analytisches-Chemisches Laboratorium des Technisches Instituts für Anorganische Chemie, Graz. IR spectra were recorded on Perkin Elmer Ft-IR spectrometer 1725X as nujol mull between KBr plates. UV/Vis spectra were recorded on Varian Cary UV-Vis-NIR spectrophotometer.

#### X-ray crystallographic determinations

Crystals of compound **3** were taken from the solution, covered with oil, mounted on glass fibres and placed immediately in a protective stream of cold nitrogen (100 K). Crystallographic data (excluding structure factors) for compound **3** has been deposited with the Cambridge Crystallographic Data Centre as a supplementary publication no. CCDC 618904 (**3**). Copies of the data can be obtained free of charge via [www.ccdc.cam.ac.uk/retrieving.html](http://www.ccdc.cam.ac.uk/retrieving.html) or on application to CCDC, 12 union Road, Cambridge CB21EZ, UK (fax: +(44)1223-336-033; email: [deposit@ccdc.cam.ac.uk](mailto:deposit@ccdc.cam.ac.uk)).

Crystal data for **3**: C<sub>26</sub>H<sub>32</sub>MoN<sub>2</sub>O<sub>5</sub>·1.5 C<sub>7</sub>H<sub>8</sub>, *M<sub>w</sub>* = 686.68, triclinic, space group *P* $\bar{1}$ , *a* = 11.700(2), *b* = 12.012(2), *c* = 12.815(2) Å,  $\alpha$  = 77.95(3)°,  $\beta$  = 73.18(3)°,  $\gamma$  = 78.95(3)° *V* = 1669.3(5) Å<sup>3</sup>, *Z* = 2,  $\rho_{\text{calc}}$  = 1.366 Mg m<sup>-3</sup>, *F*(000) = 718,  $\lambda$  = 1.54178 Å, *T* = 100(2) K,  $\mu(\text{CuK}\alpha)$  = 3.567 mm<sup>-1</sup>. Data for the structure were collected on a Bruker three-circle diffractometer equipped with Smart 6000 CCD area detector using mirror-monochromated CuK $\alpha$  radiation. The structure was solved by direct methods using SHELXS-97<sup>3</sup> and refined against *F*<sup>2</sup> on all data by full-matrix least-squares with SHELXL-97.<sup>3</sup> All non-hydrogen were refined anisotropically, while all hydrogen atoms were included in the model at geometrically calculated positions and refined using a riding model with *U*<sub>ij</sub> tied to the parent atom. Intensity measurements were performed on a rapidly cooled crystal in a range 3.65 ≤  $\theta$  ≤ 58.75. Of the 11416 measured reflections 4347 were independent (*R*<sub>int</sub> = 0.0319). The oxo and the peroxy group were disordered. For ca. 10% of the crystal the oxo group is lying on the position of the peroxy group and vice versa. A toluene molecule lying on the inversion center and a further toluene molecule were also disordered. All disordered groups were refined with distant restraints and restraints for the anisotropic displacement parameters. The final refinements converged at *R*1 = 0.0256 for *I* > 2 $\sigma$ (*I*), *wR*2 = 0.0673 for all data. The final difference Fourier synthesis gave a min/max residual electron density −0.374/+0.361 e Å<sup>3</sup>. CCDC-618904 (**3**) contains the supplementary crystallographic data for this paper. These data can be obtained free of charge via [www.ccdc.cam.ac.uk/conts/retrieving.html](http://www.ccdc.cam.ac.uk/conts/retrieving.html) (or from the Cambridge Crystallographic Data Centre, 12, Union Road, Cambridge CB21EZ, UK; fax: +(44)1223-336-033; or [deposit@ccdc.cam.ac.uk](mailto:deposit@ccdc.cam.ac.uk)).

## Syntheses

**[MoO<sub>2</sub>L<sub>2</sub>] (1):** The ligand 4-(2,6-dimethyl-phenylimino)-pent-2-en-ol<sup>1</sup> (400 mg, 2 mmol) was dissolved in 20 ml of toluene and a three-fold excess of triethylamine was added. The solution was cooled to -20 °C and added dropwise to a precooled suspension of [MoO<sub>2</sub>Cl<sub>2</sub>]<sup>2</sup> in toluene (200 mg, 1 mmol). The bright-yellow mixture was left to stir at room temperature for 2 h, then filtered over celites, concentrated to 10 ml and left at -35 °C overnight. Yellow crystals were collected, rinsed with cold pentane and dried *in vacuo* giving 280 mg of **1** (47 %). <sup>1</sup>H NMR (500 MHz, C<sub>6</sub>D<sub>6</sub>): δ 1.3 (s, 3H, H<sub>3</sub>C-C=NAr), 1.85 (s, 3H, H<sub>3</sub>C-C-O), 2.22 (s, 3H, H<sub>3</sub>C-Ar), 2.51 (s, 3H, H<sub>3</sub>C-Ar), 5.16 (s, 1H, γ-H), 6.88-7.11 (m, 3H, H-Ar) ppm. <sup>13</sup>C NMR (500 MHz, C<sub>6</sub>D<sub>6</sub>): δ 18.4 (CH<sub>3</sub>-CO), 18.8 (CH<sub>3</sub>-C-N), 23.4 (CH<sub>3</sub>-Ar), 25.6 (CH<sub>3</sub>-Ar), 102.7 (-CH), 125.4 (C-Ar), 129.3 (C-Ar), 131.8 (C-Ar), 151.8 (N-C-Ar), 170.7 (N-C-CH<sub>3</sub>), 183.1 (O-C-CH<sub>3</sub>) ppm. MS (EI): *m/z* 534 (100%) [MoO<sub>2</sub>L<sub>2</sub>]<sup>+</sup>; Anal. Calc. for C<sub>26</sub>H<sub>32</sub>MoN<sub>2</sub>O<sub>4</sub>: C, 58.64; H, 6.00; N, 5.20. Found: C, 58.97; H, 6.19; N, 4.65%; IR (KBr, cm<sup>-1</sup>): 919m, 885s, 849m, 814m.

**[MoOL<sub>2</sub>(PMe<sub>3</sub>)] (2):** Yellow **1** (300 mg, 0.5 mmol) was suspended in 80 ml of pentane and five-fold excess of trimethylphosphine (0.025 ml) was added *via* microsyringe and stirred for 2 h at room temperature. The obtained green solution was filtered over celites, concentrated to 15 ml and placed at -80 °C. After 2 days shiny green crystals were collected and dried *in vacuo* giving 142 mg of **2** (48 %). <sup>1</sup>H NMR (300 MHz, toluene-*d*<sub>8</sub>): δ 0.73 (d, 9H, P(CH<sub>3</sub>)<sub>3</sub>, <sup>3</sup>J<sub>PH</sub> = 8.7 Hz), 1.44 (s, 3H, H<sub>3</sub>C), 1.68 (s, 3H, H<sub>3</sub>C), 1.81 (s, 3H, H<sub>3</sub>C), 1.91 (s, 3H, H<sub>3</sub>C), 2.40 (s, 3H, H<sub>3</sub>C), 2.49 (s, 3H, H<sub>3</sub>C), 2.51 (s, 3H, H<sub>3</sub>C), 2.66 (s, 3H, H<sub>3</sub>C), 4.91 (s, 1H, γ-H), 5.05 (s, 1H, γ-H), 6.93-7.00 (m, 6H, H-Ar) ppm. <sup>31</sup>P NMR (500 MHz, C<sub>6</sub>D<sub>6</sub>): -5.7 ppm. MS (EI): *m/z* 518 (100%) [MoOL<sub>2</sub>]<sup>+</sup>; Anal. Calc. for C<sub>29</sub>H<sub>41</sub>MoN<sub>2</sub>O<sub>3</sub>P: C, 58.78; H, 6.97; N, 4.73. Found: C, 57.66; H, 6.77; N, 4.71%; IR (KBr, cm<sup>-1</sup>): 956m, 942m, 924m, 767s.

**[MoO(O<sub>2</sub>)L<sub>2</sub>] (3):** To a suspension of **1** (300 mg, 0.5 mmol) in 80 ml pentane 0.025 ml (2.5 mmol) of PMe<sub>3</sub> was added *via* microsyringe and stirred for 2 h at room temperature. After filtration over celites dry molecular oxygen was bubbled through a green pentane solution of **2** within few minutes. Rapid color change to orange was observed. The volume of the solution was reduced to 10 ml and bright-yellow **3** crystallized at room temperature. Following filtration and drying *in vacuo* gave 297 mg of **3** (54 %). <sup>1</sup>H NMR (200 MHz, C<sub>6</sub>D<sub>6</sub>): δ 1.42 (s, 3H, CH<sub>3</sub>), 1.51 (s, 3H, CH<sub>3</sub>), 1.55 (s, 3H, CH<sub>3</sub>), 1.86 (s, 3H, CH<sub>3</sub>), 2.22 (s, 3H, CH<sub>3</sub>), 2.27 (s, 3H, CH<sub>3</sub>), 2.51 (s, 3H, CH<sub>3</sub>), 2.67 (s, 3H, CH<sub>3</sub>), 5.13 (s, 1H, γ-H), 5.16 (s, 1H, γ-H), 6.95-7.10 (m, 6H, H-Ar) ppm. <sup>13</sup>C NMR (200 MHz, C<sub>6</sub>D<sub>6</sub>): δ 18.5, 19.1, 20.0, 24.5, 24.6, 25.0, 102.8, 103.0, 126.1, 126.2, 127.8, 128.4, 128.5, 128.8, 129.1, 131.8, 132.0, 133.0, 133.4, 133.7, 134.2 ppm. MS (EI): *m/z* 550 (100%) [MoO(O<sub>2</sub>)L<sub>2</sub>]<sup>+</sup>; Anal. Calc. for C<sub>26</sub>H<sub>32</sub>MoN<sub>2</sub>O<sub>5</sub>: C, 56.93; H, 5.88; N, 5.11. Found: C, 56.64; H, 6.19; N, 4.91%; IR (KBr, cm<sup>-1</sup>): 1144s, 948m, 895w, 864s.

## Visible optical spectroscopy

Visible absorption spectra were recorded in 1 cm quartz cells at 25 °C. The trimethylphosphine solution (2.8 10<sup>-3</sup> M) was mixed with a solution of **1** (5.6 10<sup>-5</sup> M) in the glove box, sealed and immediately measured. The spectrophotometric data were analyzed by the programm ORIGIN 5.0.

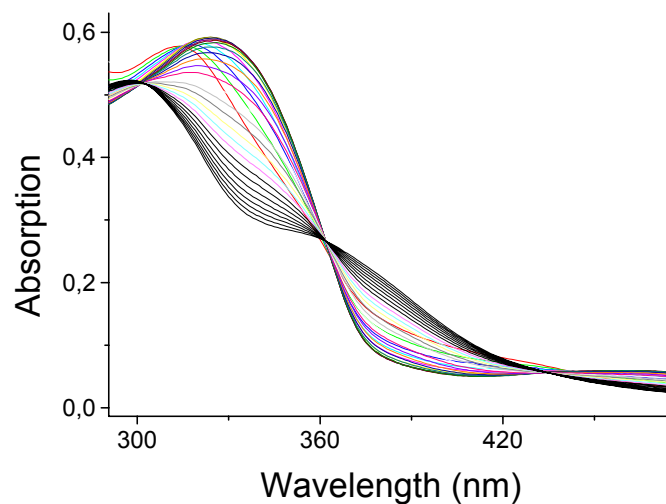

**Fig. 1** Reduction of **1** in toluene at rt. Spectra from  $t = 3$  to 90 minutes

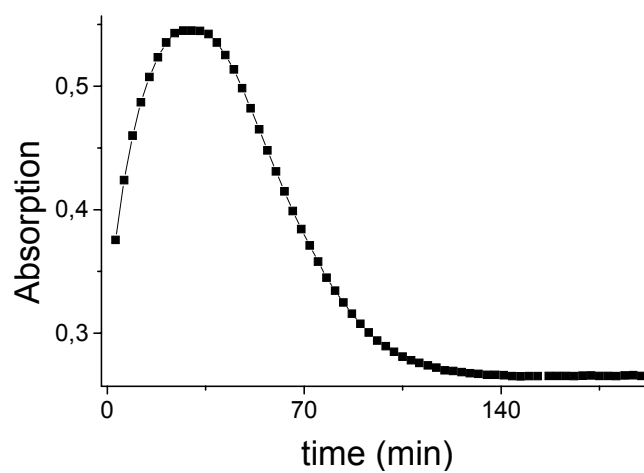

**Fig. 2** Dependence of the absorption from time at  $\lambda = 339$  nm for reaction time  $t = 3$  to 175 minutes

**Absorbance Difference Quotient Diagram**

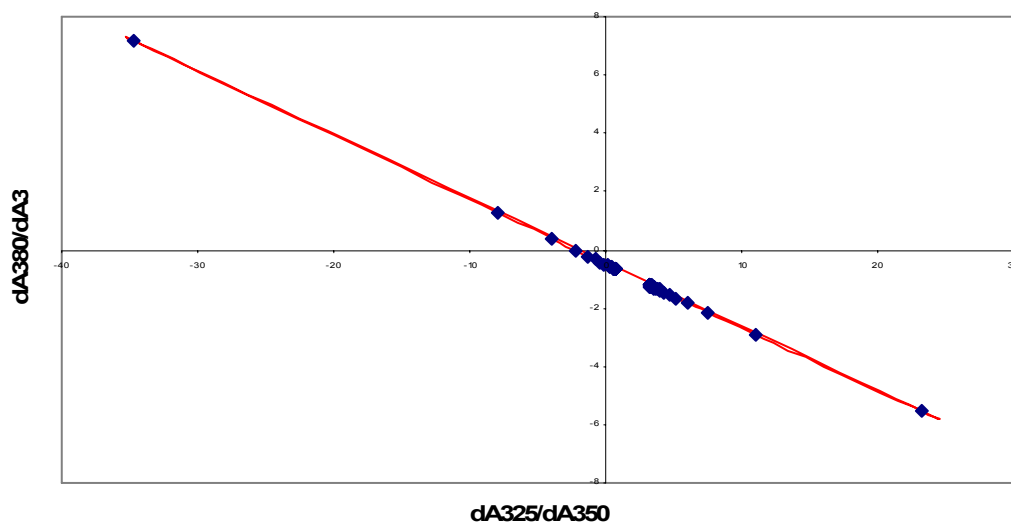

**Fig. 3** Absorbance difference quotient (ADQ) diagrams<sup>4</sup>

**References:**

- 1 D. F. Martin; G. A. Jamesonis; B. B. Martin, *J. Am. Chem. Soc.*, 1961, **83**, 73-75.
- 2 V. C. Gibson, T. P. Kee, A. Shaw, *Polyhedron*, 1990, **9**, 2293-2298.
- 3 G. M. Sheldrick, SHELXS-97, *Program for Crystal Structure Solution*, Universität Göttingen, 1997; G. M. Sheldrick, SHELXL-97, *Program for Crystal Structure Refinement*, Universität Göttingen, 1997.
- 4 H. Mauser, *Z. Naturforsch.*, 1968, **23b**, 1025-1030.
